# Disinhibition in Risky Sexual Behavior in Men, but Not Women, during Four Years of Antiretroviral Therapy in Rural, Southwestern Uganda

Annet Kembabazi<sup>1\*</sup>, Francis Bajunirwe<sup>2</sup>, Peter W. Hunt<sup>3</sup>, Jeffrey N. Martin<sup>4</sup>, Conrad Muzoora<sup>1</sup>, Jessica E. Haberer<sup>5</sup>, David R. Bangsberg<sup>5,6</sup>, Mark J. Siedner<sup>5</sup>

**1** Department of Medicine, Mbarara University of Science and Technology, Mbarara, Uganda, **2** Department of Community Health, Mbarara University of Science and Technology, Mbarara, Uganda, **3** Department of Medicine, University of California San Francisco, San Francisco, California, United States of America, **4** Department of Epidemiology and Biostatistics, University of California San Francisco, San Francisco, California, United States of America, **5** Department of Medicine, Massachusetts General Hospital and Harvard Medical School, Boston, Massachusetts, United States of America, **6** Ragon Institute of Massachusetts General Hospital, MIT and Harvard, and Harvard Medical School, Cambridge, Massachusetts, United States of America

## Abstract

**Background:** In resource-rich areas, risky sexual behavior (RSB) largely diminishes after initiation of anti-retroviral therapy, with notable exceptions among some populations who perceive a protected benefit from anti-retroviral therapy (ART). Yet, there is limited data about long-term trends in risky sexual behavior among HIV-infected people in sub-Saharan Africa after initiation of anti-retroviral therapy.

**Methods:** We administered questionnaires every three months to collect sexual behavior data among patients taking ART in southwestern Uganda over four years of follow-up time. We defined RSB as having unprotected sex with an HIV-negative or unknown status partner, or unprotected sex with a casual partner. We fit logistic regression models to estimate changes in RSB by time on ART, with and without adjustment for calendar year and CD4 count.

**Results:** 506 participants were enrolled between 2005 and 2011 and contributed a median of 13 visits and 3.5 years of observation time. The majority were female (70%) and median age was 34 years (interquartile range 29–39). There was a decrease in the proportion of men reporting RSB from the pre-ART visit to the first post-ART visit (16.2 to 4.3%,  $p < 0.01$ ) but not women (14.1 to 13.3%,  $p = 0.80$ ). With each year of ART, women reported decreasing RSB (OR 0.85 per year, 95%CI 0.74–0.98,  $p = 0.03$ ). In contrast, men had increasing odds of reporting RSB with each year of ART to near pre-treatment rates (OR 1.41, 95%CI 1.14–1.74,  $p = 0.001$ ), which was partially confounded by changes in calendar time and CD4 count (AOR = 1.24, 95%CI 0.92–1.67,  $p = 0.16$ ).

**Conclusions:** Men in southwestern Uganda reported increasing RSB over four years on ART, to levels approaching pre-treatment rates. Strategies to promote long-term safe sex practices targeted to HIV-infected men on ART might have a significant impact on preventing HIV transmission in this setting.

**Citation:** Kembabazi A, Bajunirwe F, Hunt PW, Martin JN, Muzoora C, et al. (2013) Disinhibition in Risky Sexual Behavior in Men, but Not Women, during Four Years of Antiretroviral Therapy in Rural, Southwestern Uganda. PLoS ONE 8(7): e69634. doi:10.1371/journal.pone.0069634

**Editor:** Rupert Kaul, University of Toronto, Canada

**Received:** March 12, 2013; **Accepted:** June 11, 2013; **Published:** July 19, 2013

**Copyright:** © 2013 Kembabazi et al. This is an open-access article distributed under the terms of the Creative Commons Attribution License, which permits unrestricted use, distribution, and reproduction in any medium, provided the original author and source are credited.

**Funding:** The Uganda AIDS Rural Treatment Outcomes Study is funded by U.S. National Institutes of Health (NIH) R01 MH54907 and P30 AI27763. The authors also acknowledge the following additional sources of salary support: NIH K23 MH087228 (Haberer); NIH K24 MH87227 (Bangsberg); the Harvard Institute for Global Health and NIH T32 AI007433 (Siedner). Additional study funding was provided by the Mark and Lisa Schwartz Family Foundation, the Sullivan Family Foundation, and the Bacca Foundation. The funders had no role in study design, data collection and analysis, decision to publish, or preparation of the manuscript.

**Competing Interests:** The authors have declared that no competing interests exist.

\* E-mail: akembabazi2005@yahoo.com

## Background

Approximately 2.5 million people continue to be infected with HIV each year in sub-Saharan Africa, and the majority of new infections in the region are caused by sexual transmission between sero-discordant, heterosexual partners [1]. A thorough understanding of sexual behavior among people living with HIV/AIDS (PLWHA) will be essential to further decrease HIV incidence. In the United States and Europe, early studies of sexual behavior among PLWHA noted a “disinhibition”

phenomenon after initiation of anti-retroviral therapy (ART), with increased rates of high-risk behavior in some sub-populations [2,3,4,5,6]. Yet, meta-analyses including population level data have since countered that notion [7], suggesting that increasing rates of risky behavior are largely limited to those who consider ART to be protective against transmission [8].

Recent reviews summarizing data in Sub-Saharan Africa reported similar reductions in risky sexual behavior (RSB) after ART initiation [9,10]. However, because of the relatively short period of ART availability in the region, most of these studies

**Table 1.** Baseline Sociodemographic and Sexual Behavior Characteristics for Participants in a Longitudinal Cohort Study of PLWHA using ART.

|                                                                                                       | Male Participants<br>(n = 155) | Female Participants<br>(n = 351) | Total Cohort<br>(n = 506) |
|-------------------------------------------------------------------------------------------------------|--------------------------------|----------------------------------|---------------------------|
| <b>Baseline Demographic Characteristics</b>                                                           |                                |                                  |                           |
| Age (median, IQR)                                                                                     | 38 (32–43)                     | 33 (27–38)                       | 34 (29–39)                |
| Married (%)                                                                                           | 52                             | 25                               | 32                        |
| Baseline CD4 count (median, IQR)                                                                      | 116 (54–195)                   | 139 (83–207)                     | 132 (75–202)              |
| Years of Observation Time (median, IQR)                                                               | 3.4 (1.7–3.7)                  | 3.5 (2.1–3.7)                    | 3.5 (2.1–3.7)             |
| Study Visits (median, IQR)                                                                            | 13 (15–17)                     | 13 (8–15)                        | 13 (8–15)                 |
| Enrolment Year (%)                                                                                    |                                |                                  |                           |
| 2005                                                                                                  | 14                             | 12                               | 12                        |
| 2006                                                                                                  | 24                             | 25                               | 25                        |
| 2007                                                                                                  | 34                             | 34                               | 34                        |
| 2008                                                                                                  | 18                             | 20                               | 19                        |
| 2009–2010                                                                                             | 10                             | 9                                | 10                        |
| <b>Baseline Sexual Behaviour Characteristics</b>                                                      |                                |                                  |                           |
| Age of First Sexual Encounter (median, IQR)                                                           | 19 (17–21)                     | 17 (15–19)                       | 18 (16–20)                |
| Lifetime Number of Partners (median, IQR)                                                             | 6 (4–15)                       | 3 (2–4)                          | 3 (2–6)                   |
| Any Unprotected Sex with Unknown Status or HIV- Partner Past 3 mos (%)                                | 15                             | 13                               | 14                        |
| Any Unprotected Sex with Non-Primary Partner Past 3 months                                            | 9                              | 7                                | 8                         |
| <b>Any unprotected sex with a non-primary partner or a HIV-negative or Unknown Status Partner (%)</b> | <b>16</b>                      | <b>14</b>                        | <b>15</b>                 |

doi:10.1371/journal.pone.0069634.t001

are cross sectional or limited to short follow-up times, before a durable impact of ART on sexual behaviour might be realized. One recent study in Uganda with two years of post-ART follow-up documented increasing RSB to pre-ART levels [11]. To clarify associations between ART use and sexual behavior, a thorough evaluation of sexual behavior from varying regions and sufficient duration of ART exposure will be essential. We enrolled over 500 participants in a long-term cohort of PLWHA in rural Uganda from the time of ART initiation and describe here trends in sexual behavior up to four-year after ART initiation.

## Methods

### Study Procedures

We enrolled participants in the Uganda AIDS Rural Treatment Outcomes (UARTO) study from the adult HIV clinic at Mbarara regional Referral Hospital beginning in 2005. Adult PLWHA living within 20 kilometers of the clinic (to facilitate study procedures) and initiating ART were eligible. We administered surveys at baseline (pre-ART visit) and quarterly after ART initiation to collect data on sociodemographic and sexual behavior characteristics, and collected blood samples for CD4 count testing. Trained research assistants fluent in the local language performed interviews in private study rooms. They asked about number of partners, age at first sexual encounter, number of sexual partners in the past three months (primary and casual), condom use, and HIV serostatus of partners. All participants gave written informed consent to participate.

### Ethics Statement

The study procedures were approved by ethical review committees at Partners Healthcare, University of California, San Francisco, the Mbarara University of Science and Technology and the Uganda National Council for Science and Technology.

### Statistical Analyses

Our outcome of interest was risky sexual behavior (RSB). We defined RSB as having unprotected sex with a sero-discordant or unknown status partner, or unprotected sex with a casual partner in the prior three months. We fit logistic regression models to estimate changes in RSB by year of ART use, with and without adjustment for calendar year (per year) and CD4 count (per 100 cells/mm<sup>3</sup>), divided into a two-piece segmented linear model (<300 cells/mm<sup>3</sup> and ≥300 cells/mm<sup>3</sup>) to allow for the changing slope of RSB that were apparent in graphical models. We implemented the Huber-White estimator to account for within cluster dependence from repeated measures in participants over time [12,13,14,15]. We divided the analysis by gender. We censored data after 17 quarterly visits (approximately 4 years of follow-up), after which point our dataset was limited to less than 200 participants. We evaluated for a survivorship bias by refitting our logistic regression models with participants who completed at least 17 visits of observation time.

## Results

### Baseline Characteristics

A total of 506 participants (70% female) were enrolled from the time of ART initiation from November 2005–June 2011 (Table 1). Median age was 34 years (interquartile range [IQR] 29–39) and

median CD4 count at the baseline visit was 132 cell/mm<sup>3</sup> (IQR 75–202). The median age at first sexual encounter was 17 years (IQR 15–19) in women and 18 years (IQR 16–20) in men. Women reported a median of 3 lifetime sexual partners (IQR 2–4) versus men who reported a median of 6 (4–15,  $p < 0.001$ ). At baseline, 49% of the entire cohort reported sexual contact in the past three months, and 16% of men and 14% of women met criteria for RSB in the past three months.

### Longitudinal Trends in High-Risk Sexual Behavior after Antiretroviral Therapy Initiation

Men had a significant decrease in reporting RSB from the last pre-ART to the first on-ART visit (16.2% to 4.3%,  $p = 0.002$ ). However, men reported increasing RSB for each year of ART use (OR = 1.41, 95%CI 1.15–1.74,  $p = 0.001$ , Figure 1A, Table 2), with each increasing calendar year (OR 1.28, 95%CI 1.06–1.55,  $p = 0.01$ , Figure 1C), and with each 100-cell increase in CD4 count  $< 300$  cells/mm<sup>3</sup> (OR 1.85, 95%CI 1.19–2.87,  $p = 0.01$ , Figure 1B), but not  $\geq 300$  cells/mm<sup>3</sup> (OR 0.93, 95%CI 0.72–1.19,  $p = 0.55$ ). In the multivariable model adjusted for calendar year and CD4 count, the association between years on ART and RSB remained positive, but not statistically significant (AOR = 1.24 for each year of ART use, 95%CI 0.92–1.67,  $p = 0.11$ , Table 2). We found no evidence of a survivor effect in the association between RSB and years of ART use when we restricted the analysis to men who had at least four years of sexual behavior data ( $n = 44$ , 627 visits, OR 1.50, 95%CI 1.06–2.13).

In contrast to men, we found no significant difference in RSB from the last pre-ART to the first on ART visit in women (14.1% to 13.4%  $p = 0.76$ ). In a univariable regression model of change in RSB by year of ART, women reported decreasing RSB for each additional year of ART use (OR 0.85, 95%CI 0.74–0.98,  $p = 0.03$ , Figure 1A, Table 2). In women, we found no association between RSB and either calendar year (OR 1.02, 95%CI 0.89–1.16,  $p = 0.81$ , Figure 1B), but a significant association for those with CD4 counts  $< 300$  cells/mm<sup>3</sup> only (OR 1.38 for each 100 cells, 1.04–1.83,  $p = 0.03$ , Figure 1C). The association between years on ART and RSB remained significant after adjusting for calendar year and CD4 count (OR 0.72, 95%CI 0.55–0.93,  $p = 0.01$ , Table 2). When we restricted the analysis to women for whom we had a full four years of data ( $n = 118$ , 1,601 study visits), we found similar, though muted associations for changes in RSB with each increasing year of ART use (OR = 0.94, 95%CI 0.81–1.10).

### Discussion

In this prospective cohort of HIV-infected individuals observed for approximately four years after ART initiation in southwestern Uganda, men reported a significant decline from the pre-ART to first on-ART visit, but then increasing RSB on ART, to rates similar to that of the pre-treatment period. Both calendar time and increasing CD4 partially confounded the association between time on ART and RSB, suggesting that improving health status on ART might be partially responsible for the association. In contrast, women reported decreasing rates of RSB with each year of ART use, which was independent of CD4 and temporal changes. Our findings add data to an emerging theory of sexual behavior trends among PLWHA on ART: namely, that while RSB decreases after initiating ART in most populations [8,9], that some important sub-populations also appear to report increasing RSB over time, to levels at or near pre-initiation rates [10,11,16]. This finding is of critical importance to public health experts working to decrease HIV transmission, and raises important questions about the causes of differing sexual behavior patterns, the role of targeted

1A.

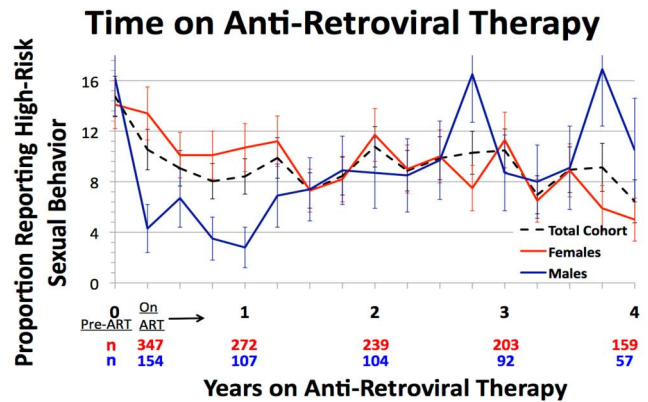

1B.

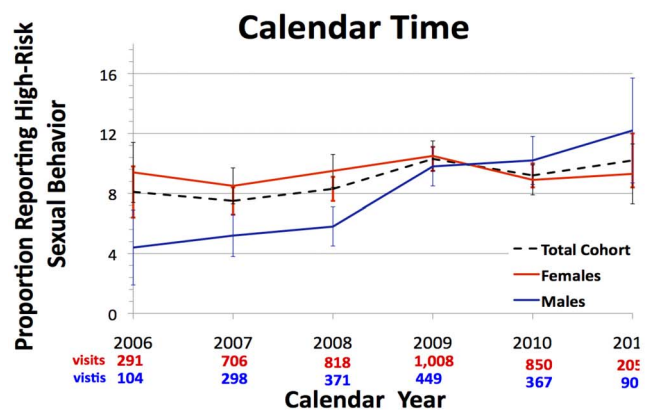

1C.

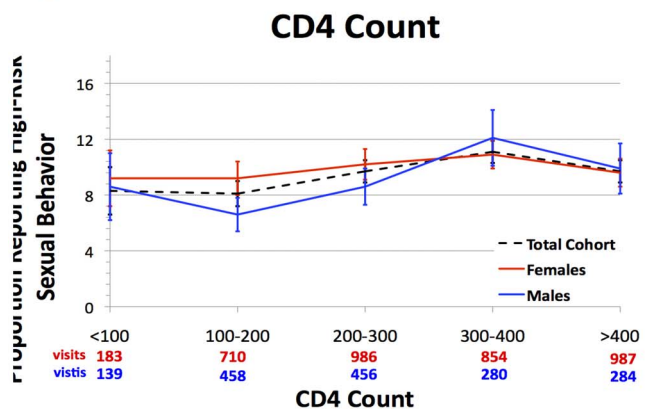

**Figures 1. Changes in high-risk sexual behavior by time from start of ART (1A), calendar time (1B), and CD4 count (1C) among a cohort of people living with HIV/AIDS in southwestern Uganda.** The red lines denote females, blue lines denote males, and black dotted lines denote the total cohort. doi:10.1371/journal.pone.0069634.g001

interventions to sub-populations, and the relationships between RSB and drug adherence.

Increasing risk behavior with ART availability was noted early in the United States among men who have sex with men (MSM) and attributed to a “disinhibition” phenomenon [2,3,4,5].

**Table 2.** Logistic regression models for trends in high-risk sexual behaviour with increasing time on ART, calendar year, and CD4 count among a cohort of HIV-infected Ugandans during treatment with anti-retroviral therapy.

|                                                           | Univariable Models |           |         | Multivariable Model |           |         |
|-----------------------------------------------------------|--------------------|-----------|---------|---------------------|-----------|---------|
|                                                           | OR                 | 95%CI     | p-value | OR                  | 95%CI     | p-value |
| <i>Female Participants (3,462 quarterly study visits)</i> |                    |           |         |                     |           |         |
| Years on ART                                              | 0.85               | 0.74–0.98 | 0.03*   | 0.72                | 0.55–0.93 | 0.01*   |
| Calendar Year (2005–2011)                                 | 1.02               | 0.89–1.16 | 0.81    | 1.19                | 0.97–1.47 | 0.10    |
| CD4 Count (per 100 cells)                                 |                    |           |         |                     |           |         |
| <300 cells/mm <sup>3</sup>                                | 1.38               | 1.04–1.83 | 0.03*   | 1.45                | 1.09–1.91 | 0.01*   |
| ≥300 cells/mm <sup>3</sup>                                | 0.90               | 0.76–1.06 | 0.21    | 0.92                | 0.78–1.09 | 0.33    |
| <i>Male Participants (1,516 quarterly visits)</i>         |                    |           |         |                     |           |         |
| Years on ART                                              | 1.41               | 1.15–1.74 | <0.001* | 1.24                | 0.92–1.67 | 0.16    |
| Calendar Year (2005–2011)                                 | 1.28               | 1.06–1.55 | 0.01*   | 1.09                | 0.83–1.42 | 0.54    |
| CD4 Count (per 100 cells)                                 |                    |           |         |                     |           |         |
| <300 cells/mm <sup>3</sup>                                | 1.85               | 1.19–2.87 | 0.01*   | 1.72                | 1.10–2.67 | 0.02*   |
| ≥300 cells/mm <sup>3</sup>                                | 0.93               | 0.72–1.19 | 0.55    | 0.92                | 0.70–1.20 | 0.53    |

doi:10.1371/journal.pone.0069634.t002

However, larger population-based studies and meta-analyses including varying risk-groups in resource rich areas noted an overall decrease in RSB over time on ART [7,8,17,18], with some studies noting increasing RSB limited to high-risk groups or those who believed that ART decreased risk of transmission [16,19,20]. Cross-sectional and relatively short longitudinal studies in sub-Saharan Africa reported decreasing RSB in the first 6–12 months after ART initiation [21,22,23,24,25,26,27]. Yet, as longer follow-up time became available, studies began reporting increasing RSB with longer ART exposures. A study in Uganda followed participants for two years after ART initiation and reported a decline in RSB among both sexes from the pre-ART to the post-ART period [28], but also an absolute increase in unprotected sex with HIV-negative or unknown status partners from 6 months to 24 months-post ART in both men and women (9% to 13% and 8% to 15% respectively). A separate seven year cohort in Uganda including participants in both the pre and post-ART periods also found significant decreases in RSB in the early post-ART period followed by a regression to pre-ART baseline levels in both men and women after two to three years of ART use [11]. We report here similar findings of a “rebound” phenomenon of increasing RSB among men, but not women, during four years of ART use in southwestern Uganda.

Further discernment of long-term trends and causes of increasing RSB will serve multiple purposes. Measurement of the association between RSB and ART adherence is a priority. Though HIV transmission can be reduced among discordant heterosexual couples when one of the partners is using ART [29,30], its impact is less clear for other routes of transmission [31] and is reduced by non-adherence. Although we did not ask participants about reasons for their sexual behavior practices, formative work to determine the causes of increasing risky sexual behavior during ART use should be pursued to help target interventions that mitigate risky behavior practices. As noted previously, some studies in developed settings have suggested that knowledge or “optimism” about the effects of ART contributes to “disinhibition” in sexual behavior [19,20]. A prospective study from Mozambique reported similar findings, namely that risky sexually behavior was strongly correlated with perceptions that ART was protective against transmission [32]. These findings would support the practice of repeated sexual behavior counselling during longterm ART provision, focusing on

risks of other sexually transmitted diseases and family planning considerations. Though multiple interventions for reducing RSB have been developed and tested with some success [33], they have predominantly focused on men who have sex with men populations in resource-rich areas [34], with some additional examples from sub-Saharan Africa that have been largely confined to studies of clinic-based interventions [35].

Our study was limited to four years of follow-up. As ART availability continues to expand in sub-Saharan Africa, and because our estimates suggest fluid trends in reporting of RSB up to four years, continued observance of the long-term trends in RSB is recommended. Moreover, we primarily focused on describing global trends of RSB and did not evaluate time varying correlates of RSB aside from CD4 count and calendar time. Future studies should measure predictors of RSB to identify at-risk sub-populations and whether adherence changes correlate with RSB. Finally, our data are limited to self-report of RSB. The validity of self-reporting sensitive information can be poor due to motivational biases, cognitive factors, and privacy concerns, with a predicted bias towards under-reporting [36]. Such a bias in our study would have led to underestimating associations between years of ART use and RSB.

In summary, while women in rural Uganda report decreasing RSB over four years after initiation of ART, men reported an initial decrease followed by increased RSB during time on ART to pre-baseline levels. Future research should focus on associations between RSB and ART adherence as well as correlates of the heterogeneous patterns of risk. Intervention strategies that are aimed specifically at high-risk groups will be needed to effectively impact RSB and HIV transmission in the region.

## Acknowledgments

We thank the UARTO participants and staff who made this study possible.

## Author Contributions

Conceived and designed the experiments: AK FB PWH JNM CM JEH DRB MJS. Performed the experiments: AK CM. Analyzed the data: AK FB MJS. Contributed reagents/materials/analysis tools: PWH JNM JEH DRB. Wrote the paper: AK FB PWH JNM CM JEH DRB MJS.

## References

- (2010) UNAIDS: Report on the Global AIDS Epidemic. Available: <http://www.unaids.org/GlobalReport/default.htm>. Accessed 2011 Nov 1.
- Colfax GN, Buchbinder SP, Cornelisse PG, Vittinghoff E, Mayer K, et al. (2002) Sexual risk behaviors and implications for secondary HIV transmission during and after HIV seroconversion. *AIDS* 16: 1529–1535.
- Tun W, Gange SJ, Vlahov D, Strathdee SA, Celentano DD (2004) Increase in sexual risk behavior associated with immunologic response to highly active antiretroviral therapy among HIV-infected injection drug users. *Clin Infect Dis* 38: 1167–1174.
- Stolte IG, Dukers NH, Geskus RB, Coutinho RA, de Wit JB (2004) Homosexual men change to risky sex when perceiving less threat of HIV/AIDS since availability of highly active antiretroviral therapy: a longitudinal study. *AIDS* 18: 303–309.
- Dukers NH, Goudsmit J, de Wit JB, Prins M, Weverling GJ, et al. (2001) Sexual risk behaviour relates to the virological and immunological improvements during highly active antiretroviral therapy in HIV-1 infection. *AIDS* 15: 369–378.
- Kalichman SC, Kelly JA, Rompa D (1997) Continued high-risk sex among HIV seropositive gay and bisexual men seeking HIV prevention services. *Health Psychol* 16: 369–373.
- Marks G, Crepaz N, Senterfit JW, Janssen RS (2005) Meta-analysis of high-risk sexual behavior in persons aware and unaware they are infected with HIV in the United States: implications for HIV prevention programs. *J Acquir Immune Defic Syndr* 39: 446–453.
- Crepez N, Hart TA, Marks G (2004) Highly active antiretroviral therapy and sexual risk behavior: a meta-analytic review. *JAMA* 292: 224–236.
- Venkatesh KK, Flanigan TP, Mayer KH (2011) Is expanded HIV treatment preventing new infections? Impact of antiretroviral therapy on sexual risk behaviors in the developing world. *AIDS* 25: 1939–1949.
- Berhan A, Berhan Y (2012) Is the Sexual Behaviour of HIV Patients on Antiretroviral therapy safe or risky in Sub-Saharan Africa? Meta-Analysis and Meta-Regression. *AIDS Res Ther* 9: 14.
- Shafer LA, Nsubuga RN, White R, Mayanja BN, Chapman R, et al. (2011) Antiretroviral therapy and sexual behavior in Uganda: a cohort study. *AIDS* 25: 671–678.
- Freedman DA (2006) On the so-called "Huber sandwich estimator" and "robust standard errors". *The American Statistician* 60: 299–302.
- Rogers HW (1993) Regression standard errors in clustered samples. *Stata Technical Bulletin* 13: 19–23.
- Huber PJ (1967) The behavior of maximum likelihood estimates under nonstandard conditions. Berkeley, CA. University of California Press. 221–233.
- White H (1980) A heteroskedasticity-consistency covariance matrix estimator and a direct test for heteroskedasticity. *Econometrica* 48: 817–830.
- Heijman T, Geskus RB, Davidovich U, Coutinho RA, Prins M, et al. (2012) Less decrease in risk behaviour from pre-HIV to post-HIV seroconversion among MSM in the combination antiretroviral therapy era compared with the pre-combination antiretroviral therapy era. *AIDS* 26: 489–495.
- Wolf K, Young J, Rickenbach M, Vernazza P, Flepp M, et al. (2003) Prevalence of unsafe sexual behavior among HIV-infected individuals: the Swiss HIV Cohort Study. *Journal of acquired immune deficiency syndromes* 33: 494–499.
- Scheer S, Chu PL, Klausner JD, Katz MH, Schwarcz SK (2001) Effect of highly active antiretroviral therapy on diagnoses of sexually transmitted diseases in people with AIDS. *Lancet* 357: 432–435.
- Ostrow DE, Fox KJ, Chmiel JS, Silvestre A, Visscher BR, et al. (2002) Attitudes towards highly active antiretroviral therapy are associated with sexual risk taking among HIV-infected and uninfected homosexual men. *AIDS* 16: 775–780.
- Van de Ven P, Rawstorne P, Nakamura T, Crawford J, Kippax S (2002) HIV treatments optimism is associated with unprotected anal intercourse with regular and with casual partners among Australian gay and homosexually active men. *International journal of STD & AIDS* 13: 181–183.
- Kaida A, Gray G, Bastos FI, Andia I, Maier M, et al. (2008) The relationship between HAART use and sexual activity among HIV-positive women of reproductive age in Brazil, South Africa, and Uganda. *AIDS Care* 20: 21–25.
- Moatti JP, Prudhomme J, Traore DC, Juillet-Amari A, Akribi HA, et al. (2003) Access to antiretroviral treatment and sexual behaviours of HIV-infected patients aware of their serostatus in Cote d'Ivoire. *AIDS* 17 Suppl 3: S69–77.
- Sarna A, Luchters SM, Geibel S, Kaai S, Munyao P, et al. (2008) Sexual risk behaviour and HAART: a comparative study of HIV-infected persons on HAART and on preventive therapy in Kenya. *International journal of STD & AIDS* 19: 85–89.
- Bateganya M, Colfax G, Shafer LA, Kityo C, Mugenyi P, et al. (2005) Antiretroviral therapy and sexual behavior: a comparative study between antiretroviral-naïve and -experienced patients at an urban HIV/AIDS care and research center in Kampala, Uganda. *AIDS patient care and STDs* 19: 760–768.
- Bunnell R, Ekwaru JP, Solberg P, Wamai N, Bikaako-Kajura W, et al. (2006) Changes in sexual behavior and risk of HIV transmission after antiretroviral therapy and prevention interventions in rural Uganda. *AIDS* 20: 85–92.
- Luchters S, Sarna A, Geibel S, Chersich MF, Munyao P, et al. (2008) Safer sexual behaviors after 12 months of antiretroviral treatment in Mombasa, Kenya: a prospective cohort. *AIDS patient care and STDs* 22: 587–594.
- Peltzer K, Ramlagan S (2010) Safer sexual behaviours after 1 year of antiretroviral treatment in KwaZulu-Natal, South Africa: a prospective cohort study. *Sexual health* 7: 135–141.
- Bechange S, Bunnell R, Awor A, Moore D, King R, et al. (2010) Two-year follow-up of sexual behavior among HIV-uninfected household members of adults taking antiretroviral therapy in Uganda: no evidence of disinhibition. *AIDS and behavior* 14: 816–823.
- Cohen MS, Chen YQ, McCauley M, Gamble T, Hosseinipour MC, et al. (2011) Prevention of HIV-1 infection with early antiretroviral therapy. *The New England journal of medicine* 365: 493–505.
- Baeten JM, Donnell D, Ndase P, Mugo NR, Campbell JD, et al. (2012) Antiretroviral prophylaxis for HIV prevention in heterosexual men and women. *The New England journal of medicine* 367: 399–410.
- Cohen MS, Muessig KE, Smith MK, Powers KA, Kashuba AD (2012) Antiviral agents and HIV prevention: controversies, conflicts, and consensus. *AIDS* 26: 1585–1598.
- de Walque D, Kazianga H, Mead O (2012) Antiretroviral therapy perceived efficacy and risky sexual behavior: Evidence from Mozambique. *Economic Development and Cultural Change* 61: 97–126.
- Kalichman SC, Rompa D, Cage M, DiFonzo K, Simpson D, et al. (2001) Effectiveness of an intervention to reduce HIV transmission risks in HIV-positive people. *American journal of preventive medicine* 21: 84–92.
- Herbst JH, Sherba RT, Crepez N, Deluca JB, Zohrabayan L, et al. (2005) A meta-analytic review of HIV behavioral interventions for reducing sexual risk behavior of men who have sex with men. *Journal of acquired immune deficiency syndromes* 39: 228–241.
- Cornman DH, Kiene SM, Christie S, Fisher WA, Shuper PA, et al. (2008) Clinic-based intervention reduces unprotected sexual behavior among HIV-infected patients in KwaZulu-Natal, South Africa: results of a pilot study. *Journal of acquired immune deficiency syndromes* 48: 553–560.
- Schroder KE, Carey MP, Vanable PA (2003) Methodological challenges in research on sexual risk behavior: I. Item content, scaling, and data analytical options. *Annals of behavioral medicine* : a publication of the Society of Behavioral Medicine 26: 76–103.
